# Supplementary material
Source: HighWire-hosted journal article supplement (https://bmjopen.bmj.com/content/8/5/e020809)
Supplement: inline-supplementary-material-2 [file inline-supplementary-material-2.pdf]

**Supplementary file 2 – Latent Class Analysis – model selection and response probabilities**

| Model selection for LCA of physical measurement methods |                |    |        |        |         |       |
|---------------------------------------------------------|----------------|----|--------|--------|---------|-------|
| N class                                                 | G <sup>2</sup> | df | AIC    | BIC    | $\ell$  | %     |
| 1                                                       | 201.60         | 26 | 211.60 | 229.95 | -814.64 | 100.0 |
| 2                                                       | 36.66          | 20 | 58.66  | 99.03  | -732.18 | 100.0 |
| 3                                                       | 12.04          | 14 | 46.04  | 108.43 | -719.87 | 100.0 |
| 4                                                       | 6.37           | 8  | 52.37  | 136.78 | -717.03 | 27.0  |

| <b>Response Probabilities for the 5 PA measurement methods for each Latent Classes</b> |             |              |             |
|----------------------------------------------------------------------------------------|-------------|--------------|-------------|
|                                                                                        | <b>1</b>    | <b>2</b>     | <b>3</b>    |
|                                                                                        | <b>n=91</b> | <b>n=157</b> | <b>n=42</b> |
| <b>Class membership probabilities</b>                                                  | 0.3466      | 0.4962       | 0.1572      |
| <b>Item response probabilities</b>                                                     |             |              |             |
| Use simple sensors, yes                                                                | 0.4083      | 0.0438       | 0.7518      |
| Use complex sensors, yes                                                               | 0.1373      | 0.0104       | 0.7801      |
| Use paper/digital questionnaires, yes                                                  | 0.9363      | 0.2942       | 0.6741      |
| Use paper/digital diaries, yes                                                         | 0.5740      | 0.0949       | 0.6754      |
| Use ACT, yes                                                                           | 0.3209      | 0.0647       | 1.0         |
